# Supplementary material for: Intelligence-Augmented Rat Cyborgs in Maze Solving
Source: PLoS One. 2016 Feb 9;11(2):e0147754. doi: 10.1371/journal.pone.0147754 (PMC4747605; doi:10.1371/journal.pone.0147754)
Supplement: S1 Table — (XLS) [file pone.0147754.s005.xls]

## Sheet: Sheet1
Maze	Our algorithm						Wall follower						Pledge																		Tremaux
													west				north				east				south				average
	left-hand rule		right-hand rule		average		left-hand rule		right-hand rule		average		left-hand rule		right-hand rule		left-hand rule		right-hand rule		left-hand rule		right-hand rule		left-hand rule		right-hand rule				trial 1		trial 2		trial 3		trial 4		trial 5		trial 6		trial 7		trial 8		trial 9		trial 10
	steps	coverage	steps	coverage	steps	coverage	steps	coverage	steps	coverage	steps	coverage	steps	coverage	steps	coverage	steps	coverage	steps	coverage	steps	coverage	steps	coverage	steps	coverage	steps	coverage	steps	coverage	steps	coverage	steps	coverage	steps	coverage	steps	coverage	steps	coverage	steps	coverage	steps	coverage	steps	coverage	steps	coverage	steps
1	107	65	55	39	81	52	117	70	83	53	100	61.5	91	57	83	53	67	45	87	55	119	70	209	94	117	70	61	42	104.25	60.75	95	59	105	64	131	77	117	70	113	68	125	74	145	84	141	82	123	73	139
2	47	37	109	68	78	52.5	65	46	135	81	100	63.5	55	41	131	79	125	67	135	81	71	48	241	100	63	45	93	60	114.25	65.125	97	62	117	72	139	83	109	68	139	83	109	68	105	66	85	56	137	82	143
3	61	53	61	53	61	53	77	61	77	61	77	61	67	56	71	58	99	64	77	61	83	62	153	76	77	61	55	50	85.25	61	97	71	101	73	65	55	71	58	115	79	79	62	95	70	145	94	143	93	117
4	27	23	55	46	41	34.5	33	26	77	57	55	41.5	27	23	73	55	19	19	81	57	33	26	41	39	33	26	55	46	45.25	36.375	147	83	147	83	147	83	133	76	147	83	147	83	147	83	133	76	147	83	83
5	23	21	125	72	74	46.5	23	21	177	98	100	59.5	23	21	173	96	23	21	193	99	23	21	37	28	23	21	143	81	79.75	48.5	39	29	19	19	23	21	19	19	161	90	177	98	177	98	19	19	23	21	23
6	57	44	67	49	62	46.5	75	53	71	51	73	52	67	49	71	51	87	54	71	51	83	53	47	39	73	52	67	49	70.75	49.75	127	78	99	65	53	42	91	60	89	60	95	62	103	67	103	67	103	67	83
7	65	44	81	51	73	47.5	75	49	99	60	87	54.5	67	45	93	57	99	57	99	60	87	52	33	27	75	49	71	46	78	49.125	47	34	153	86	89	54	129	74	81	50	59	41	83	51	131	75	143	83	149
8	47	38	57	40	52	39	59	44	67	45	63	44.5	49	39	65	44	129	75	67	45	71	47	35	29	59	44	59	41	66.75	45.5	143	84	139	82	137	81	169	94	153	86	143	84	143	84	141	83	137	81	169
9	81	65	113	81	97	73	85	67	115	82	100	74.5	71	60	115	82	155	77	119	82	91	70	165	91	85	67	115	82	114.5	76.375	85	67	93	71	107	78	99	74	91	70	95	72	117	83	85	67	95	72	101
10	73	61	99	76	86	68.5	81	65	115	84	98	74.5	77	63	115	84	175	81	127	84	81	65	133	84	81	65	137	84	115.75	76.25	135	91	87	67	141	94	141	94	141	94	137	92	113	81	119	83	87	67	133
11	77	65	121	87	99	76	77	65	123	88	100	76.5	199	86	123	88	179	81	141	88	91	72	169	88	77	65	123	88	137.75	82	107	80	97	75	93	73	91	72	101	77	115	84	105	79	89	71	93	73	137
12	107	73	83	63	95	68	107	73	83	63	95	68	271	99	83	63	267	99	101	72	125	81	167	85	107	73	83	63	150.5	79.375	95	67	111	75	91	64	77	58	79	61	111	75	69	54	73	58	111	75	69
13	95	95	95	95	95	95	99	97	99	97	99	97	99	97	99	97	103	97	99	97	101	97	141	98	99	97	143	98	110.5	97.25	101	98	103	99	101	98	99	97	95	95	101	98	103	99	101	98	99	97	97
14	95	95	95	95	95	95	99	97	99	97	99	97	143	98	99	97	141	98	101	97	99	97	103	97	99	97	99	97	110.5	97.25	101	98	97	96	97	96	101	98	99	97	101	98	99	97	97	96	99	97	101
15	99	61	81	52	90	56.5	109	66	91	57	100	61.5	95	59	89	56	127	68	93	58	117	67	55	39	109	66	81	52	95.75	58.125	171	97	63	43	125	74	105	64	107	65	67	45	101	62	153	88	103	63	95
16	67	47	111	69	89	58	79	53	119	73	99	63	57	42	119	73	163	86	121	73	79	53	259	96	73	50	117	72	123.5	68.125	89	58	77	52	113	70	95	61	81	54	115	71	115	71	65	46	89	58	61
17	73	54	81	58	77	56	97	66	91	63	94	64.5	171	88	91	63	163	87	93	63	97	66	53	44	97	66	87	61	106.5	67.25	65	50	97	66	111	73	81	58	71	53	133	84	107	71	107	71	59	47	89
18	109	82	61	58	85	70	121	88	61	58	91	73	117	86	61	58	133	89	61	58	129	88	173	93	121	88	183	97	122.25	82.125	95	74	99	76	111	82	141	97	141	97	141	97	107	80	141	97	107	80	141
19	105	62	95	57	100	59.5	105	62	95	57	100	59.5	105	62	95	57	105	62	113	66	123	70	95	57	105	62	95	57	104.5	61.625	107	63	107	63	141	80	107	63	135	77	109	64	105	62	105	62	141	80	135
20	57	39	105	63	81	51	71	46	129	75	100	60.5	63	42	117	69	29	25	139	76	77	49	187	84	71	46	93	57	97	56	91	56	79	50	65	43	127	74	91	56	71	46	73	47	75	48	75	48	75
21	79	51	99	61	89	56	83	53	117	70	100	61.5	81	52	117	70	217	96	127	74	83	53	185	85	83	53	109	66	125.25	68.625	131	77	109	66	87	55	145	84	141	82	99	61	139	81	131	77	113	68	123
22	71	48	95	60	83	54	91	58	109	67	100	62.5	83	54	105	65	99	60	109	67	95	59	163	81	91	58	75	50	102.5	61.75	133	79	107	66	81	53	105	65	123	74	129	77	105	65	129	77	65	45	99
23	133	77	41	31	87	54	153	87	47	34	100	60.5	127	74	47	34	61	41	49	34	155	88	89	49	149	85	43	32	90	54.625	45	33	35	28	71	46	165	93	55	38	35	28	43	32	35	28	71	46	165
24	53	47	127	89	90	68	53	47	131	91	92	69	53	47	109	75	53	47	149	91	63	52	189	91	53	47	237	94	113.25	68	87	63	67	54	83	61	91	65	139	89	139	89	139	89	139	89	87	63	71
Mean					81.6667	59.5833					92.5833	65.0417																	102.677	65.4531
S.E.M.					3.0779	3.0556					2.5938	2.6471																	4.821	3.1293
S.E.M.: standard error of the mean
[truncated: 3 more columns]
