# Supplementary material for: Intelligence-Augmented Rat Cyborgs in Maze Solving
Source: PLoS One. 2016 Feb 9;11(2):e0147754. doi: 10.1371/journal.pone.0147754 (PMC4747605; doi:10.1371/journal.pone.0147754)
Supplement: S2 Table — (XLS) [file pone.0147754.s006.xls]

## Sheet: Sheet1
Maze	Computer						DH12						SV15						SV17						MV12						M01						M03
	left-hand rule		right-hand rule		average		rat			rat cyborg			rat			rat cyborg			rat			rat cyborg			rat			rat cyborg			rat			rat cyborg			rat			rat cyborg
	steps	coverage	steps	coverage	steps	coverage	steps	coverage	time(s)	steps	coverage	time(s)	steps	coverage	time(s)	steps	coverage	time(s)	steps	coverage	time(s)	steps	coverage	time(s)	steps	coverage	time(s)	steps	coverage	time(s)	steps	coverage	time(s)	steps	coverage	time(s)	steps	coverage	time(s)	steps	coverage	time(s)
1	107	65	55	39	81	52	155	62	273	69	38	87	87	49	290	39	30	40	37	30	654	107	58	268	69	42	126	71	43	538	123	64	133	43	36	113	81	49	75	79	51	181
2	47	37	109	68	78	52.5	79	43	83	29	28	24	77	46	839	63	44	111	99	51	392	59	42	128	89	42	1297	71	38	219	83	52	69	37	32	75	33	31	21	33	31	13
3	61	53	61	53	61	53	127	64	109	51	45	58	97	58	632	67	56	61	137	70	448	63	49	404	119	63	1070	61	51	401	71	56	62	87	63	66	79	64	39	47	47	17
4	27	23	55	46	41	34.5	63	39	64	85	49	290	61	45	361	49	42	110	53	32	194	57	36	385	143	55	536	115	49	916	89	52	74	37	32	76	19	20	10	49	31	30
5	23	21	125	72	74	46.5	53	29	57	49	28	96	61	32	110	23	19	74	19	19	164	19	19	41	63	27	454	49	28	237	299	88	277	71	30	82	289	90	209	19	20	6
6	57	44	67	49	62	46.5	41	36	32	37	33	42	41	35	95	33	32	22	43	31	471	39	35	276	163	49	1428	113	44	641	55	40	53	31	31	17	51	40	29	35	33	14
7	65	44	81	51	73	47.5	21	21	30	21	21	23	35	28	140	29	23	70	23	22	260	37	29	184	139	66	519	83	40	293	37	32	27	21	21	22	65	47	45	23	23	10
8	47	38	57	40	52	39	51	39	89	25	23	31	27	24	588	23	23	33	35	32	188	31	26	80	83	50	471	87	49	173	37	33	53	29	26	21	45	36	132	23	22	9
9	81	65	113	81	97	73	91	65	151	67	58	92	113	55	279	65	56	95	91	62	363	70	51	191	103	56	521	83	56	223	161	76	141	137	75	131	149	71	121	59	58	23
10	73	61	99	76	86	68.5	99	66	150	91	70	285	109	70	321	95	70	329	113	72	376	89	70	312	119	81	656	69	61	173	173	74	167	79	65	71	205	86	153	133	73	141
11	77	65	121	87	99	76	389	82	670	223	79	359	255	84	762	87	66	121	187	81	459	127	70	415	89	68	204	85	64	308	225	84	349	123	73	80	373	89	290	89	66	58
12	107	73	83	63	95	68	243	86	291	160	69	310	79	59	97	135	73	442	83	58	232	55	48	294	115	56	373	79	51	365	135	67	449	81	64	61	309	93	287	109	70	48
13	95	95	95	95	95	95	115	95	252	99	95	50	115	95	252	95	95	142	111	95	108	95	95	217	117	95	236	95	95	88	247	98	165	95	95	77	133	96	118	99	95	46
14	95	95	95	95	95	95	121	95	102	95	95	64	139	95	98	99	95	100	95	95	290	95	95	353	169	95	347	99	95	88	141	95	167	99	95	95	359	96	492	107	95	36
Mean					77.7857	60.5	117.714	58.7143	168.071	78.6429	52.2143	129.357	92.5714	55.3571	347.429	64.4286	51.7143	125	80.4286	53.5714	328.5	67.3571	51.6429	253.429	112.857	60.3571	588.429	82.8571	54.5714	333.071	134	65.0714	156.143	69.2857	52.7143	70.5	156.429	64.8571	144.357	64.5714	51.0714	45.1429
S.E.M.					4.9014	5.1296	25.7012	6.5871	44.9546	14.9364	6.8918	32.7393	15.2765	6.257	68.6761	9.1157	6.8375	31.4814	12.9249	7.0631	40.1948	8.4083	6.3528	31.6906	8.7366	5.2483	106.851	4.9634	5.2032	61.5823	21.5282	5.8568	33.1334	9.8781	6.919	8.8198	33.9239	7.2672	36.3454	10.0639	6.9206	13.9646
S.E.M.: standard error of the mean
