# Supplementary material for: Intelligence-Augmented Rat Cyborgs in Maze Solving
Source: PLoS One. 2016 Feb 9;11(2):e0147754. doi: 10.1371/journal.pone.0147754 (PMC4747605; doi:10.1371/journal.pone.0147754)
Supplement: S4 Table — (XLS) [file pone.0147754.s008.xls]

## Sheet: Sheet1
		Pulse frequency (ms)	Pulse width (ms)	Pulse count	Voltage （v）
DH12	Forward	10	1	10	5
	Left	10	1	10	2
	Right	10	1	10	2
SV15	Forward	10	1	10	6.5
	Left	10	1	10	4
	Right	10	1	10	3
SV17	Forward	10	1	10	6
	Left	10	1	10	3
	Right	10	1	10	3.5
MV12	Forward	10	1	10	7
	Left	10	1	10	4
	Right	10	1	10	5
M01	Forward	10	1	10	3
	Left	10	1	10	5
	Right	10	1	10	3
M03	Forward	10	1	10	2
	Left	10	1	10	3
	Right	10	1	10	3
